# Supplementary material
Source: PubMed Central journal article supplement (PMC4157092)
Supplement: NIHMS612890-supplement-1.pdf [file NIHMS612890-supplement-1.pdf]

Supplementary Figure 1:

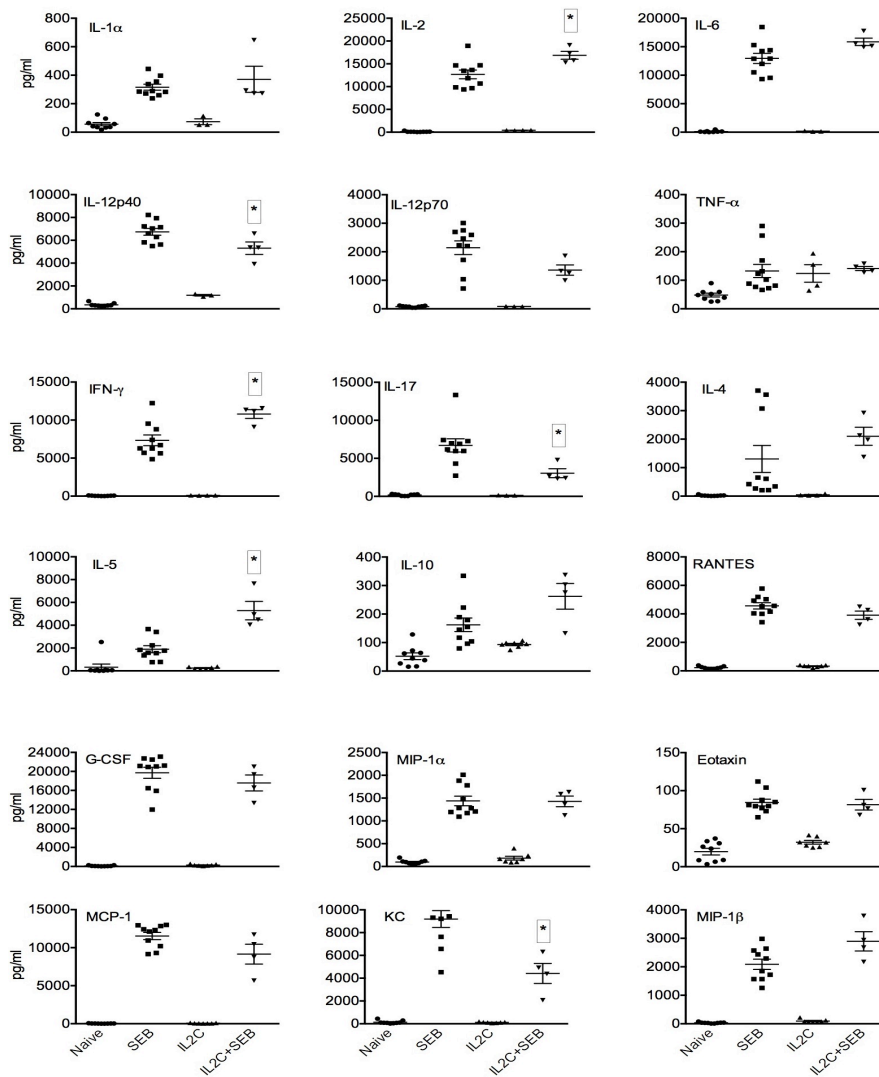

SEB-induced systemic cytokine/chemokine surge in naïve and pump-IL2C-treated HLA-DR3 transgenic.

HLA-DR3 transgenic mice were left untreated or implanted with mini-osmotic pumps delivering IL2C (pump-IL2C). On day 7, mice were challenged with SEB (50 µg/mouse) or PBS and bled 3 hours later. Concentrations of indicated cytokines/chemokines were determined using multiplex assay. Each bar represents mean±SE of data obtained from 4-8 mice in each group. \* p<0.05 compared to naïve mice.

## Supplementary Figure 2:

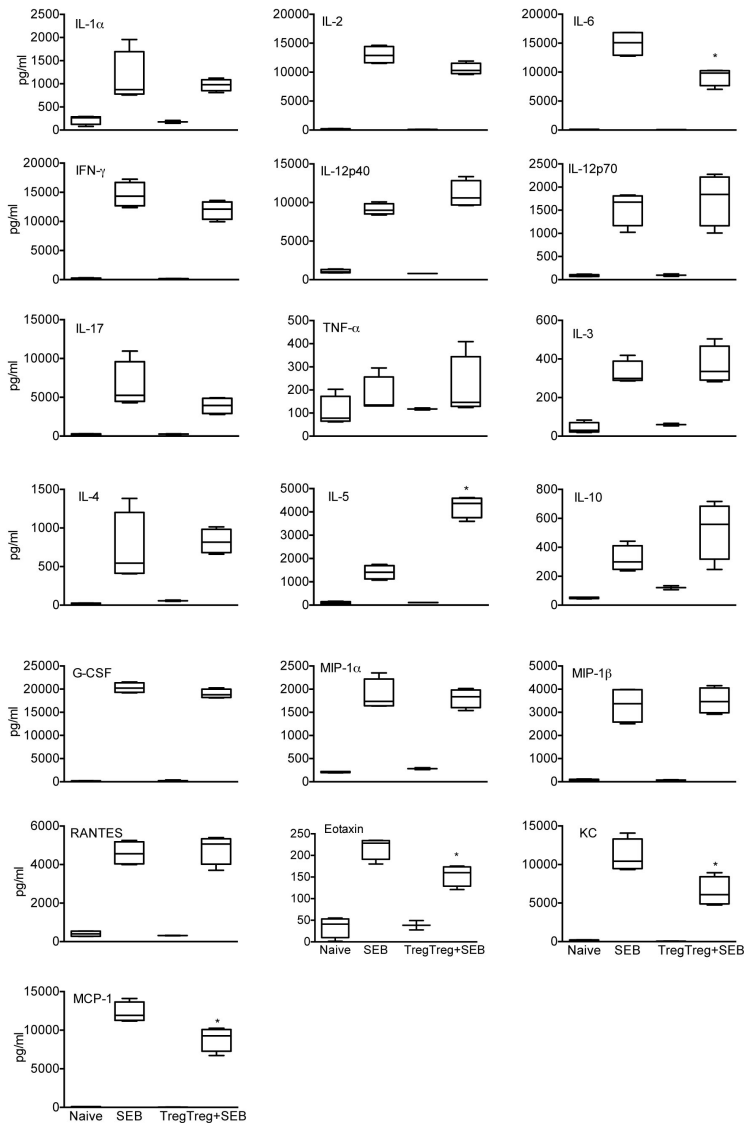

Modulatory effects of adoptively transferred Tregs on SEB-induced systemic cytokine/chemokine surge in HLA-DR3 transgenic mice. Five million Tregs expanded in vitro with anti-CD3 and anti-CD28 beads were adoptively transferred into naïve HLA-DR3 transgenic mice by intravenous infusion. Twenty-four hours later, recipient mice were challenged with SEB (50  $\mu$ g/mouse) or PBS and bled 3 hours later. Concentrations of indicated cytokines/chemokines were determined using multiplex assay. Each bar represents mean $\pm$ SE of data obtained from 4-8 mice in each group. \* p<0.05 compared to naïve mice.

Supplementary Figure 3:

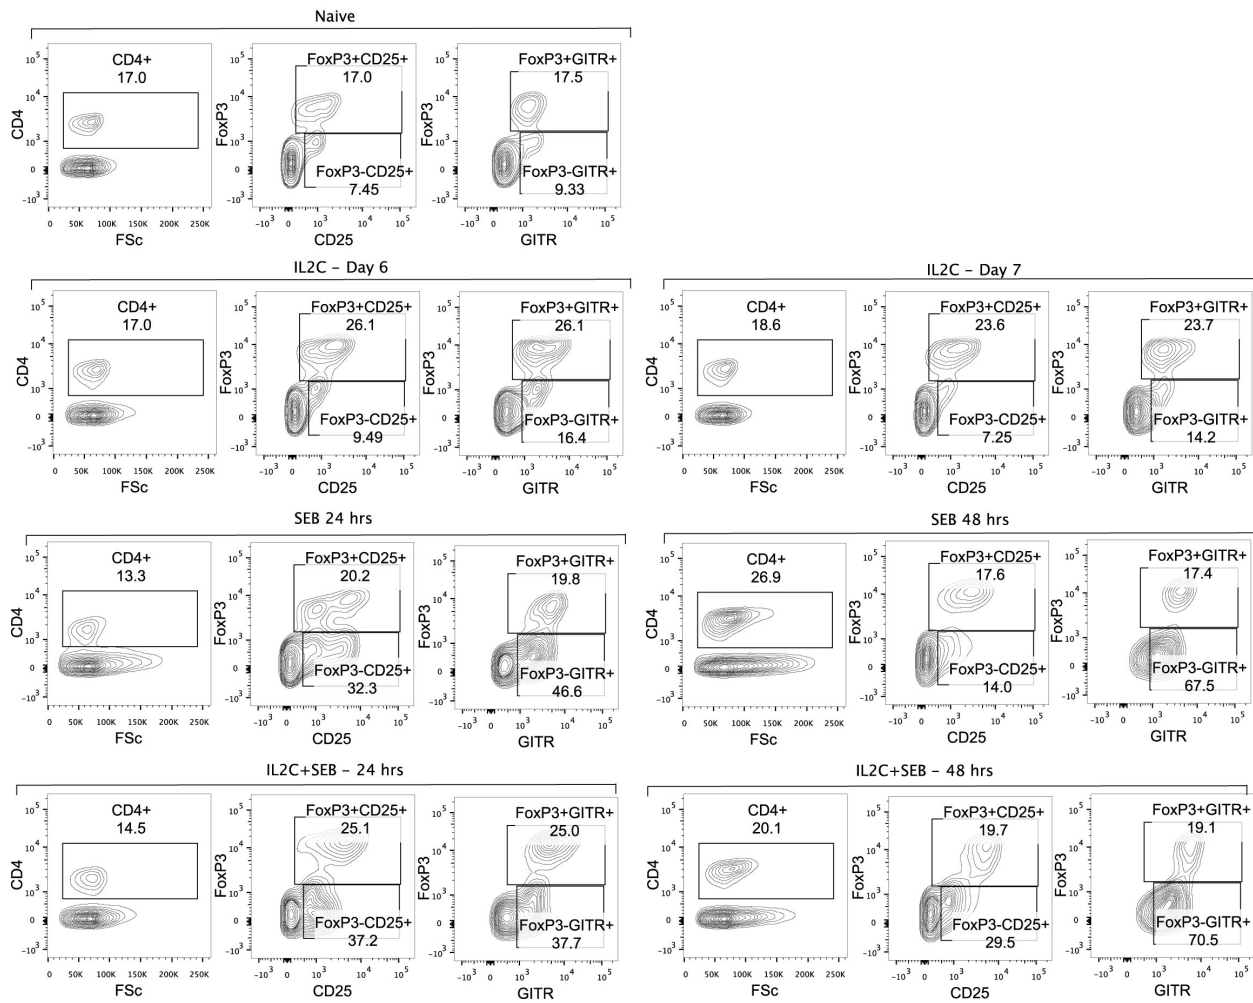

Homeostasis of Tregs and GITR expression during SEB-induced TSS. HLA-DR3 transgenic mice were left untreated or treated with 3xIL2C to expand Tregs. On day 5, mice were challenged with SEB (50  $\mu$ g/mouse) or PBS. Mice were killed 24 (day 6) or 48 hours (day 7) later, splenocytes isolated and stained with indicated antibodies to track the expression profile of CD25<sup>+</sup> and GITR<sup>+</sup> T cells. Representative dot plots are shown.

Supplementary Figure 4:

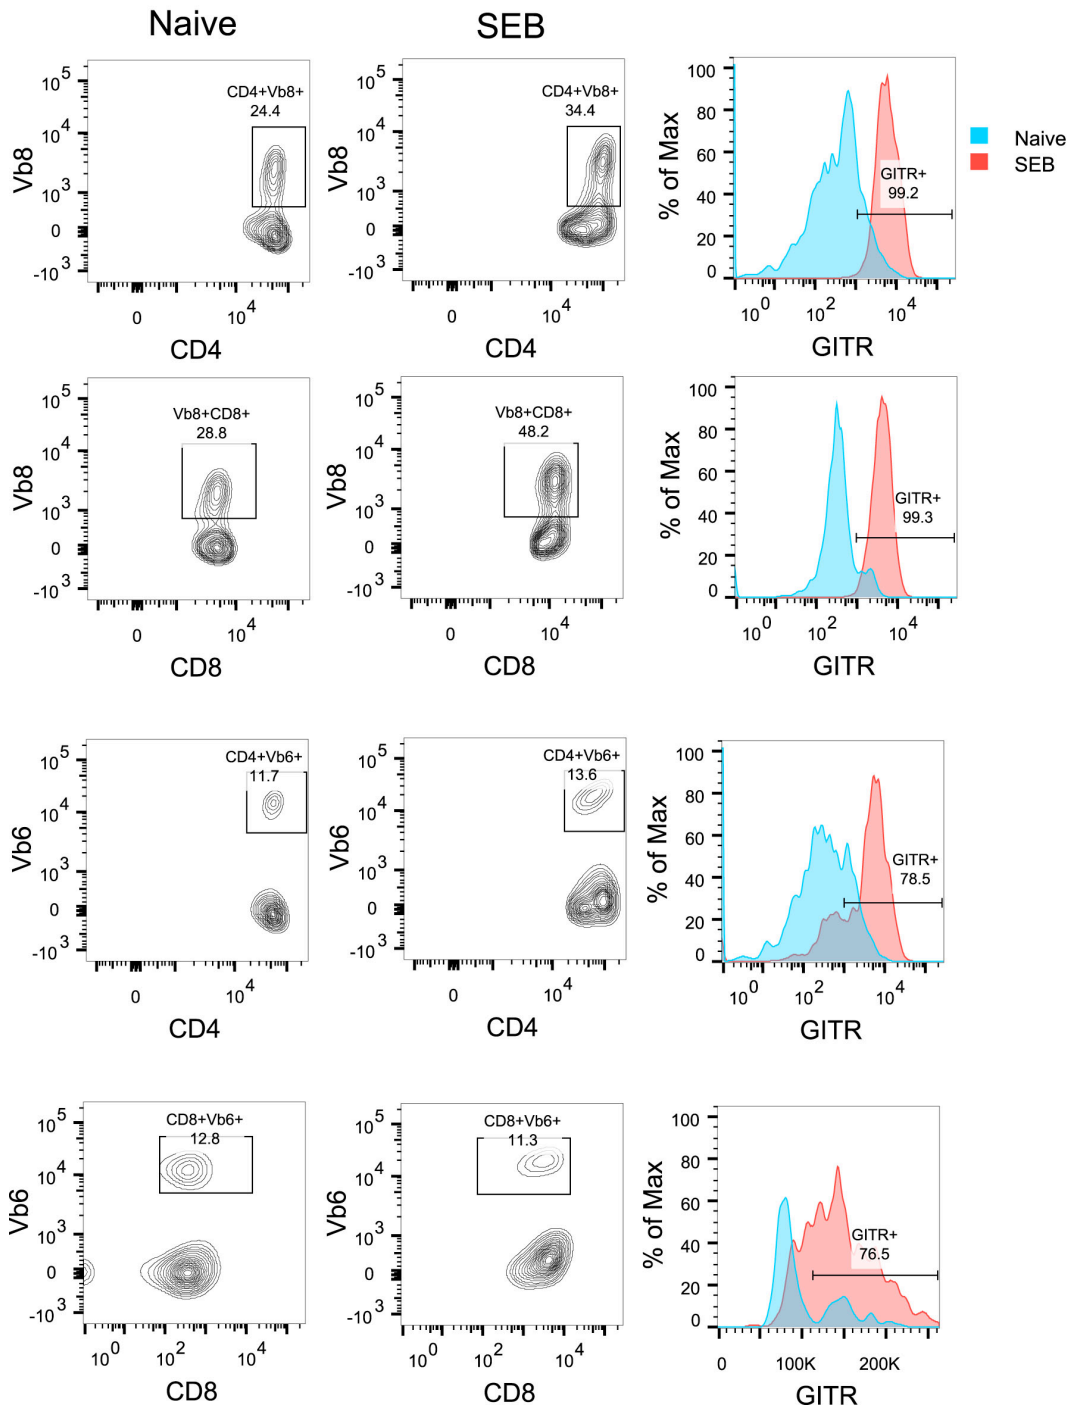

Expression profile of GTR on T cells during SEB-induced TSS in HLA-DR3 transgenic mice. HLA-DR3 transgenic mice were challenged with SEB (50  $\mu$ g/mouse) or PBS. Mice were killed 48 hours later, splenocytes isolated and expression profiles of GTR on CD4<sup>+</sup> and CD8<sup>+</sup> T cells bearing the SEB-reactive TCR Vb8 and SEB-non-reactive TCR Vb6 were determined. Representative data is shown.
